# Supplementary material for: BioFeatureFinder: Flexible, unbiased analysis of biological characteristics associated with genomic regions
Source: bioRxiv or medRxiv preprint supplement (doi:10.1101/279612), 2018-03-22

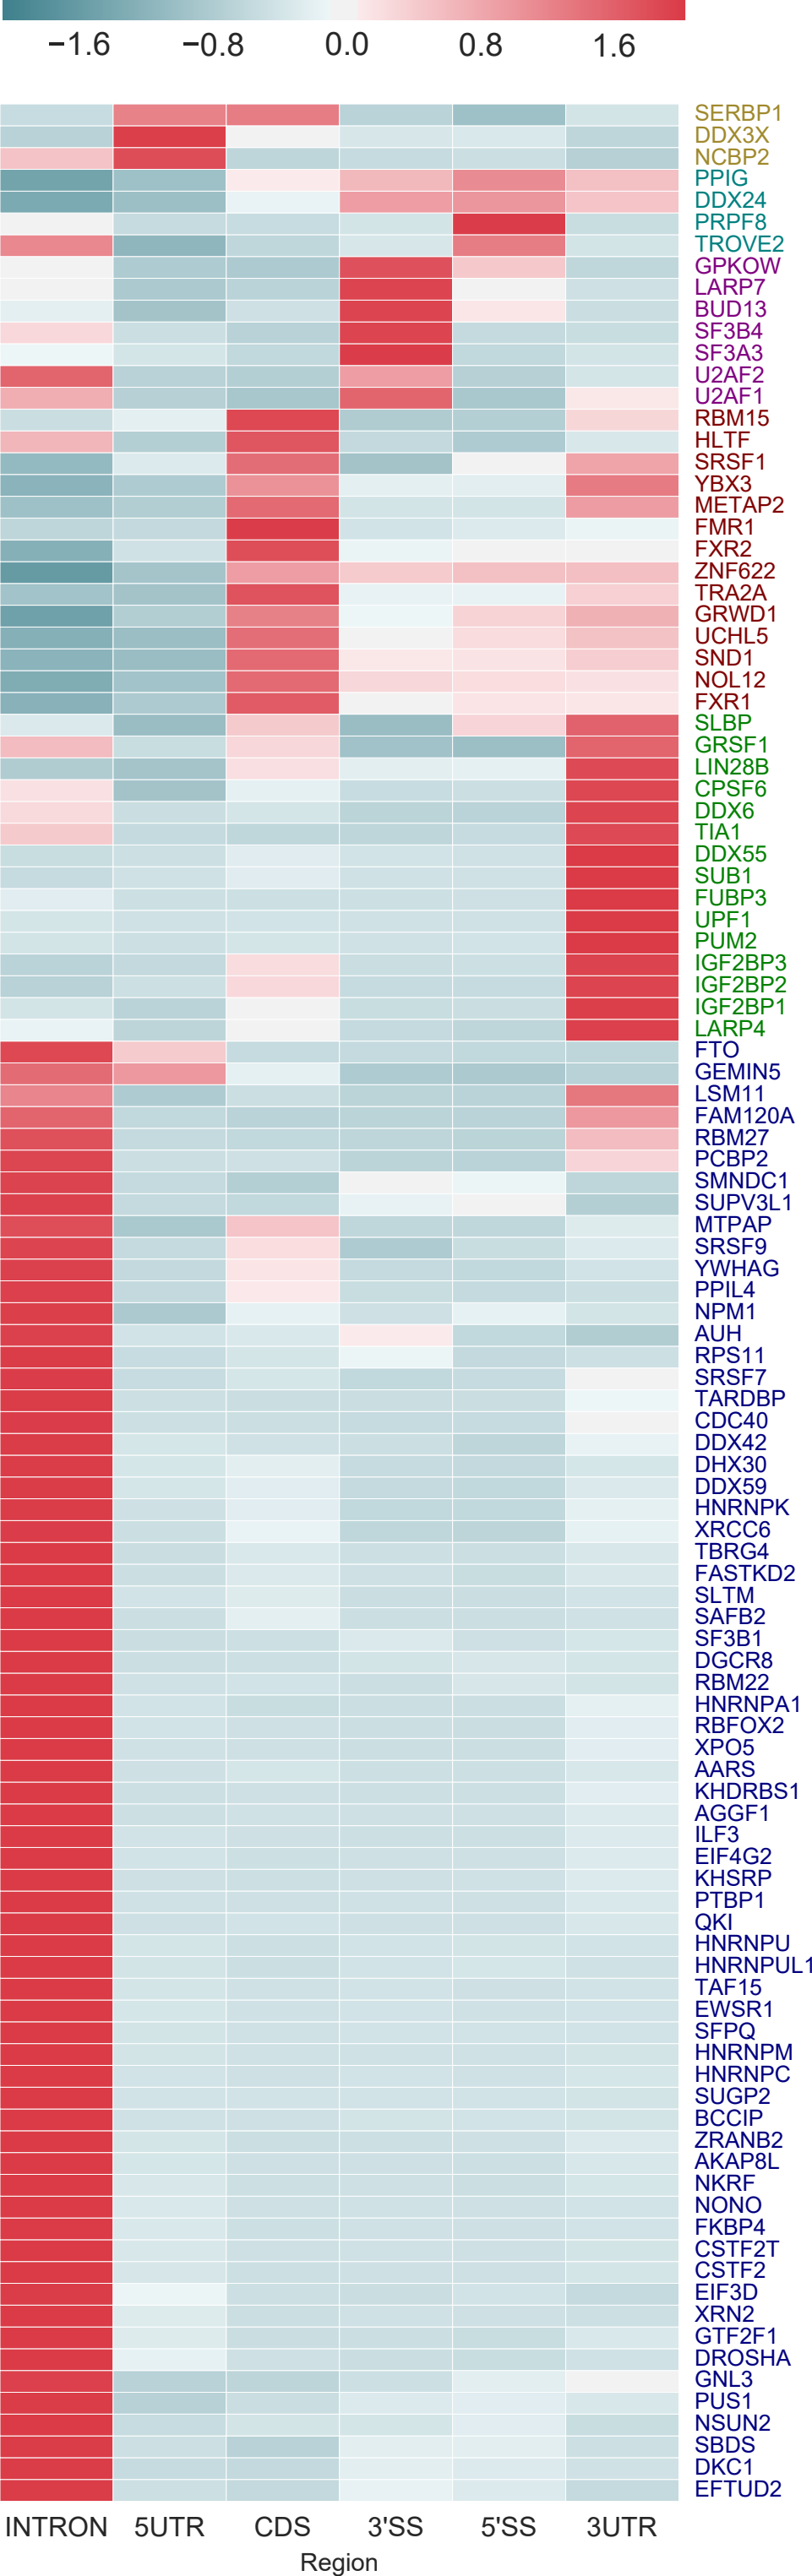

Supplement: Supplementary file [file 279612-6.pdf]
